# Supplementary material for: Reversible interaction of 1-butyl-1-methylpyrrolidinium cations with 5,7,12,14-pentacenetetrone from a pure ionic liquid electrolyte for dual-ion batteries
Source: Royal Society of Chemistry journal article supplement (doi:10.1039/c9cc04626g), 2019-01-01
Supplement: c9cc04626g1.pdf [file c9cc04626g1.pdf]

## Supporting Information

### Reversible interaction of 1-butyl-1-methylpyrrolidinium cations with 5, 7, 12, 14-pentacenetetrone from pure ionic liquid electrolyte for dual-ion batteries

Yaobing Fang,<sup>a</sup> Caiying Chen,<sup>a</sup> Jiaxin Fan<sup>a</sup>, Mengdie Zhang,<sup>a</sup> Wenhui Yuan,<sup>\*ac</sup> and Li Li<sup>b</sup>

#### Section SI. Experimental Section

##### Electrodes preparation:

The cathode was prepared by blending 90 wt% of natural graphite flake (Aladdin, 1200 mesh, purity >99.9%), 2 wt% acetylene black (Cell Grade, Zhengzhou Jinghong New-Energy Technology Co. Ltd.), and 8 wt% PVDF (Arkema) in NMP, which was then coated on aluminum foil (thickness: 30  $\mu\text{m}$ , purity >99.9%), dried at 100°C for 12 h under vacuum. The anode was prepared by blending 70 wt% 5, 7, 12, 14-pentacenetetrone (Aladdin, >95.0% (HPLC)), 20 wt% acetylene black (Cell Grade, Zhengzhou Jinghong New-Energy Technology Co. Ltd.), and 10 wt% PVDF (Arkema) in NMP, which was coated on aluminum foil (thickness: 30  $\mu\text{m}$ , purity >99.9%), dried at 100°C for 12 h under vacuum. The average mass loading of the graphite cathodes and 5, 7, 12, 14-pentacenetetrone anodes were 4.8 and 0.97  $\text{mg cm}^{-1}$ , respectively. According to the work of Schmuelling<sup>7</sup>, the maximum capacity of the insertion of TFSI<sup>-</sup> into graphite is 115  $\text{mA h g}^{-1}$ . In this work, to better understand the behavior of PCT, the graphite cathodes are excess. The ionic liquid 1-butyl-1-methylpyrrolidiniumbis (trifluoromethylsulfonyl)imide (Pyr<sub>14</sub>TFSI, purity 99%), PP<sub>14</sub>TFSI and EmimTFSI were purchased from Lanzhou Institute of Chemical Physics (China).

##### Electrochemical measurement:

Electrochemical tests were measured using CR2025 coin-type cells with ~100  $\mu\text{L}$  electrolyte. Coin cells were assembled in glove box ( $[\text{O}_2] < 0.01\text{ppm}$ ,  $[\text{H}_2\text{O}] < 0.01\text{ppm}$ ) with argon. Galvanostatic charge-discharge tests were carried out on a Neware CT-4008 battery test system (China) at room temperature. Cyclic voltammetry (CV) tests were characterized on a Gamry electrochemical workstation (US) at a scan rate of 0.5  $\text{mV s}^{-1}$ , and the electrochemical impedance spectroscopy (EIS) tests were characterized on a Gamry electrochemical workstation (US).

##### Characterization:

The Ex-situ XRD measurements were performed on a Bruker D8 ADVANCE diffractometer (Germany). The morphologies and structure of the graphite cathode and 5, 7, 12, 14-pentacenetetrone anode were characterized by Hitachi SU8220 field emission electron microscope.

## Section SII. Supporting Figure and Table

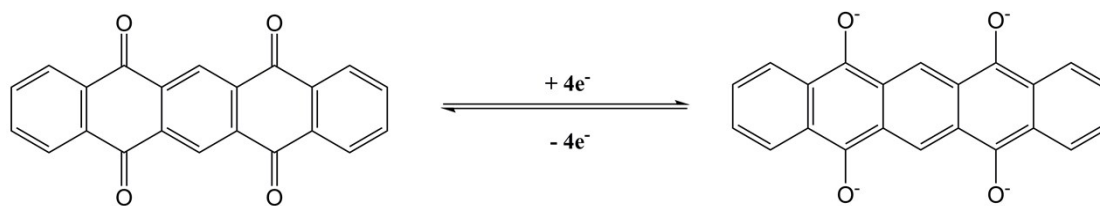

**Fig. S1** Full four electron redox reactions of 5, 7, 12, 14-pentacenetrone

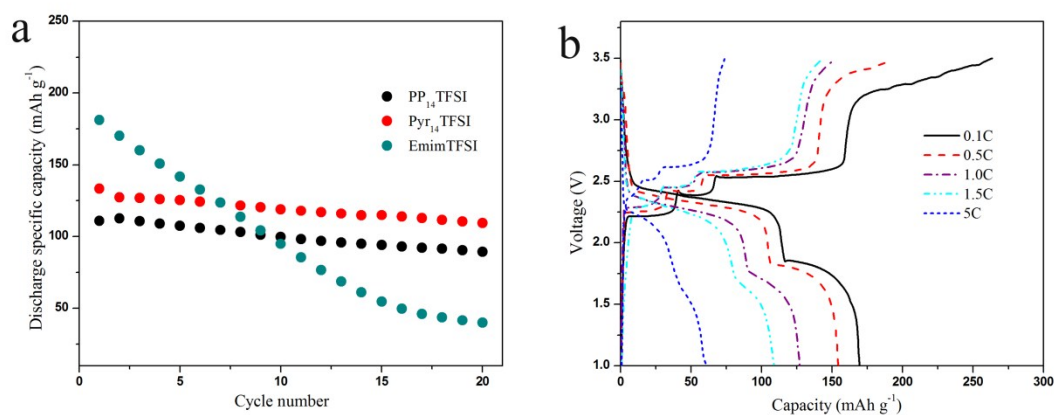

**Fig. S2** a) Cycling performance of the graphite//PCT DIBs with of different pure ionic liquid electrolyte (PP<sub>14</sub>TFSI, Pyr<sub>14</sub>TFSI, EmimTFSI). b) Charge-discharge curves of the graphite//PCT DIBs at 0.1, 0.5, 1.0, 1.5, 5 C.

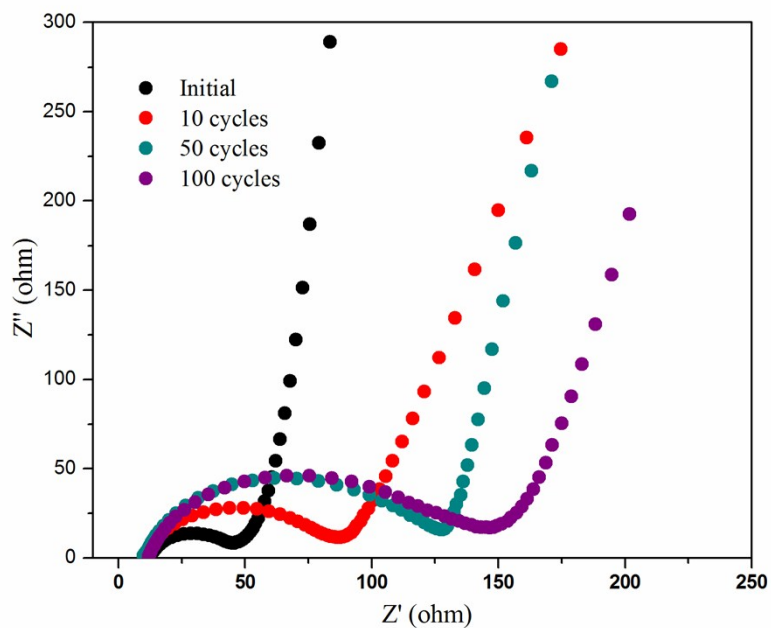

**Fig.S3** Electrochemical impedance curves of graphite//PCT DIBs for different cycles.

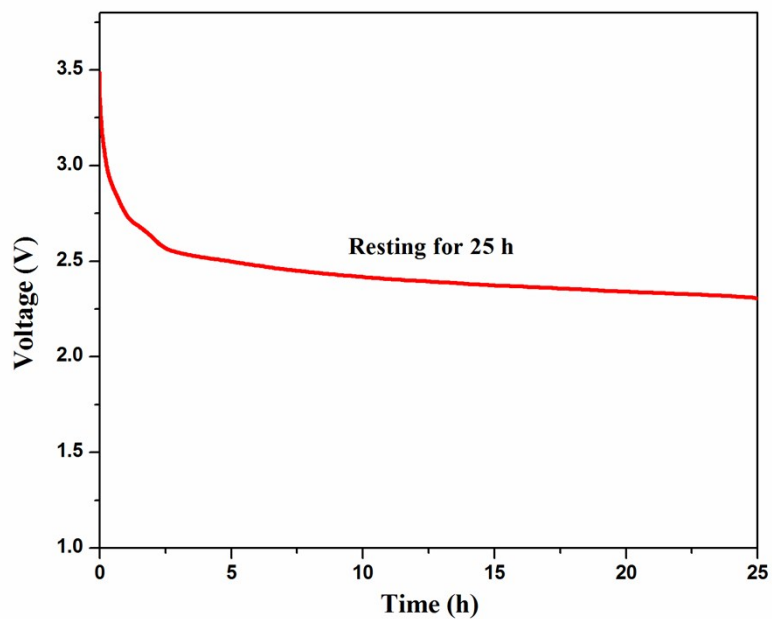

**Fig. S4** Open circuit voltage–time curve of the PCT//graphite cell (charged to 3.5 V)

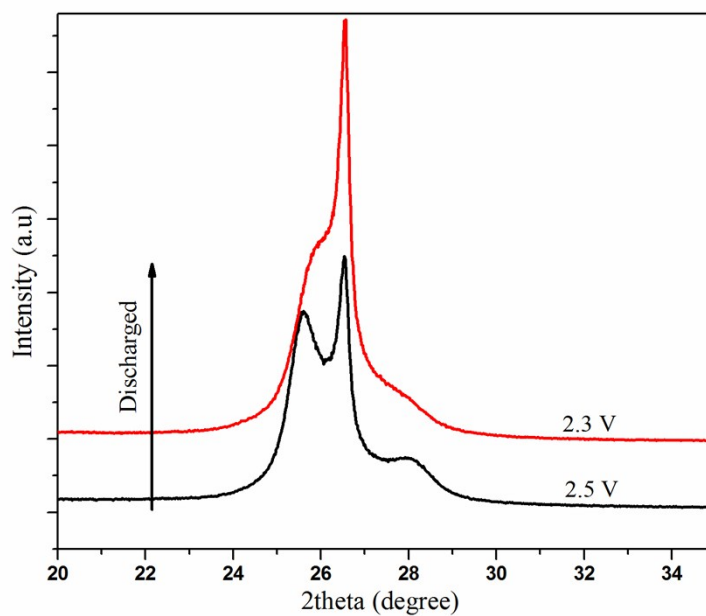

**Fig. S5** Ex-situ X-ray diffraction (XRD) spectra of graphite cathode when discharged from 2.5 V to 2.3 V.

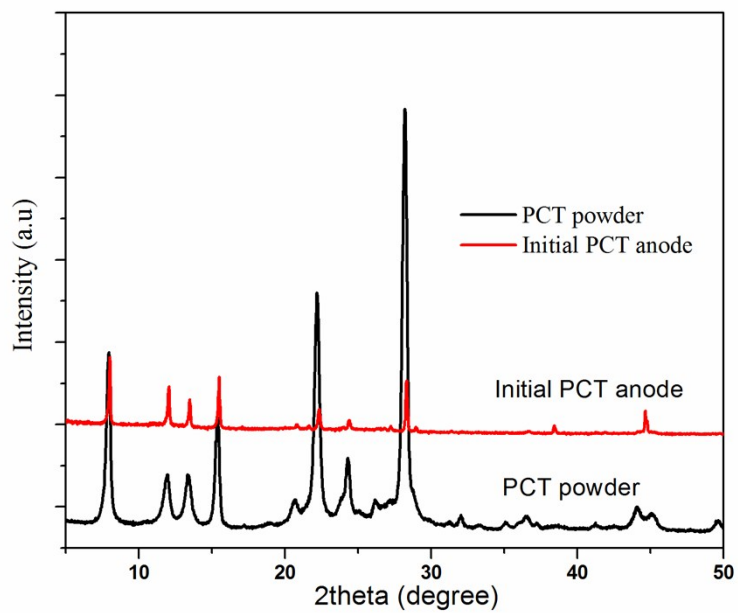

**Fig. S6** Ex-situ X-ray diffraction (XRD) spectra of PCT powder and initial PCT anode

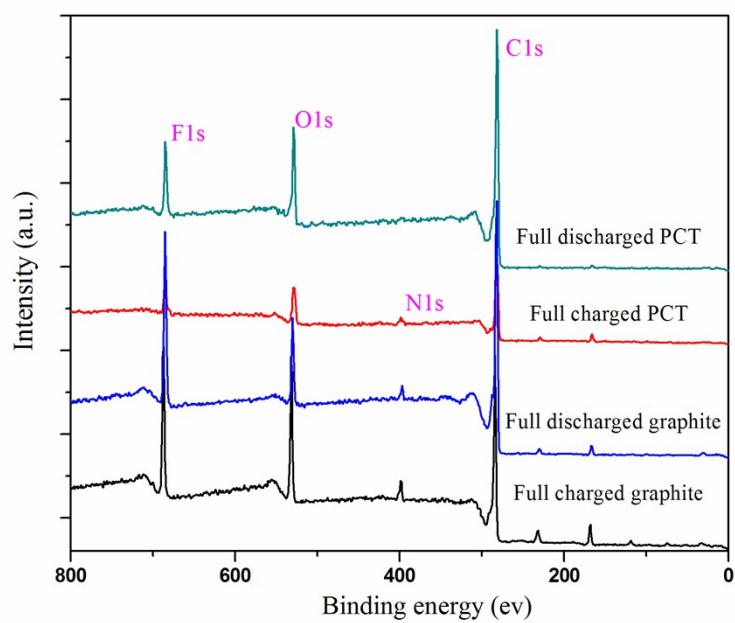

**Fig. S7** XPS spectra of electrodes at different states

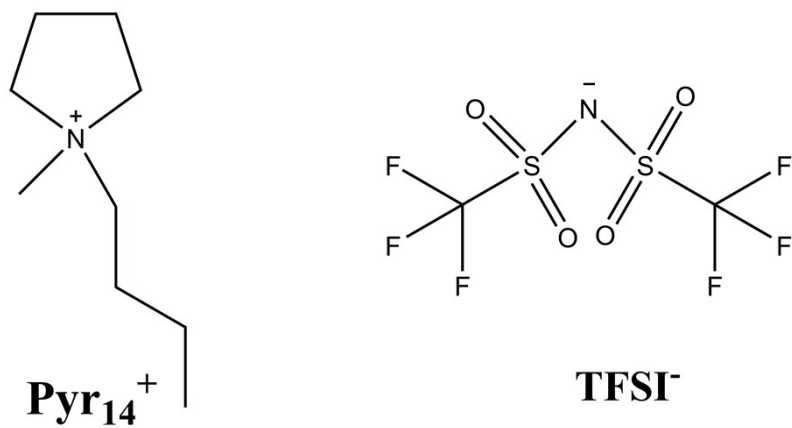

Fig. S8 The structure diagram of Pyr<sub>14</sub>TFSI

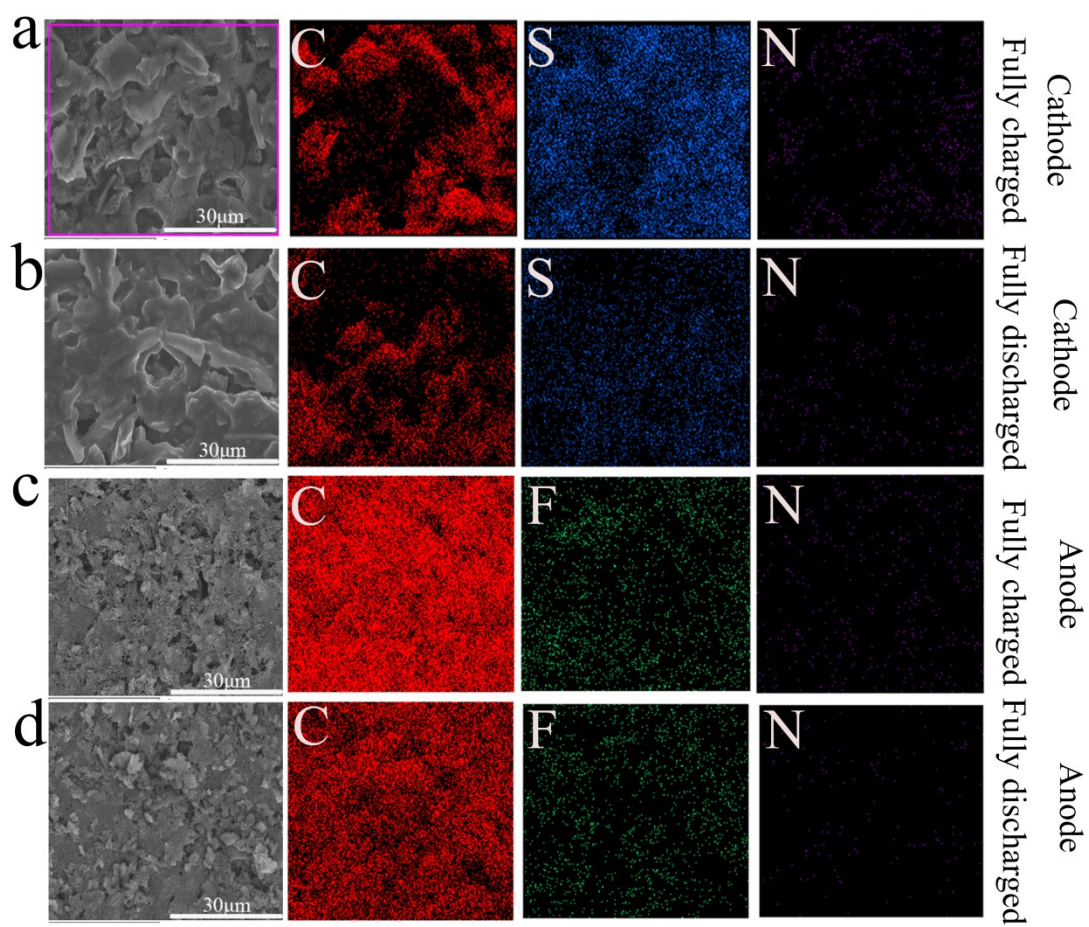

Fig. S9 Elemental mapping of C, S, F, and N in the fully charged and discharged: a, b) cathode and c, d) anode.

**Table S1:** The XPS results of graphite electrodes at different states

| element  | Full charged graphite cathode |              |             | Full discharged graphite cathode |              |             |
|----------|-------------------------------|--------------|-------------|----------------------------------|--------------|-------------|
|          | Position BE (ev)              | Atomic Conc% | Mass Conc % | Position BE (ev)                 | Atomic Conc% | Mass Conc % |
| <b>F</b> | 688.100                       | 14.56        | 20.15       | 685.300                          | 15.79        | 22.34       |
| <b>O</b> | 532.100                       | 16.08        | 18.75       | 529.900                          | 6.66         | 7.94        |
| <b>N</b> | 399.300                       | 2.92         | 2.98        | 397.500                          | 2.43         | 2.53        |
| <b>C</b> | 284.500                       | 66.43        | 58.12       | 282.400                          | 75.12        | 67.19       |

**Table S2:** The XPS result PCT electrodes at different states

| element  | Full charged PCT anode |              |             | Full discharged PCT anode |              |             |
|----------|------------------------|--------------|-------------|---------------------------|--------------|-------------|
|          | Position BE (ev)       | Atomic Conc% | Mass Conc % | Position BE (ev)          | Atomic Conc% | Mass Conc % |
| <b>F</b> | 686.200                | 9.57         | 13.73       | 684.900                   | 6.54         | 9.66        |
| <b>O</b> | 529.300                | 12.04        | 14.55       | 528.900                   | 9.62         | 11.97       |
| <b>N</b> | 399.500                | 4.13         | 4.37        | 396.500                   | 0.46         | 0.51        |
| <b>C</b> | 282.200                | 74.26        | 67.35       | 282.200                   | 83.38        | 77.87       |
